# Supplementary material for: Alternative Routes of Zoonotic Vaccinia Virus Transmission, Brazil
Source: PubMed Central journal article supplement (PMC4672421; doi:10.3201/eid2112.141249), 2015-12
Supplement: 14-1249-Techapp-s1.pdf [file 14-1249-Techapp-s1.pdf]

# Alternative Routes of Zoonotic Vaccinia Virus Transmission, Brazil

## Technical Appendix

**Technical Appendix Table 1.** Epidemiologic data for 5 family members regarding exposure to vaccinia virus, Brazil

| Characteristic                 | Patient      |              |               |               |          |
|--------------------------------|--------------|--------------|---------------|---------------|----------|
|                                | Father       | Mother       | Twin daughter | Twin daughter | Daughter |
| Occupation                     | Rural worker | Rural worker | Student       | Student       | Student  |
| Contact with cows and horses   | Yes          | Yes          | No            | No            | No       |
| Contact with the environment   | No           | No           | No            | No            | No       |
| Vaccinated                     | Yes          | Yes          | No            | No            | No       |
| Consumption of raw milk/cheese | Yes          | Yes          | Yes           | Yes           | Yes      |
| Milked cows                    | Yes          | No           | No            | No            | No       |
| Cheese production              | Yes          | Yes          | No            | No            | No       |

**Technical Appendix Table 2.** Diagnostic results for 5 patients exposed to vaccinia virus, Brazil\*

| Patient       | Virus isolation | Serologic result<br>(neutralizing units/mL) | Quantitative PCR result |           | Standard PCR result |              |           |
|---------------|-----------------|---------------------------------------------|-------------------------|-----------|---------------------|--------------|-----------|
|               |                 |                                             | <i>vgf</i>              | <i>ha</i> | <i>vgf</i>          | <i>ati</i> † | <i>ha</i> |
| Father        | –               | + (800)                                     | +                       | +         | +                   | +            | –         |
| Mother        | ND              | + (3,200)                                   | +                       | +         | –                   | –            | –         |
| Twin daughter | ND              | –                                           | –                       | +         | –                   | +            | –         |
| Twin daughter | ND              | –                                           | +                       | –         | –                   | –            | –         |
| Daughter      | ND              | + (800)                                     | –                       | –         | –                   | +            | –         |

\*PCR was performed with serum and swab samples from patient A. Other PCRs were performed only with serum samples. *vgf*, virus growth factor gene; *ha*, hemagglutinin gene; *ati*, A-type inclusion gene; –, negative; +, positive; ND, not done.

†By seminested PCR.

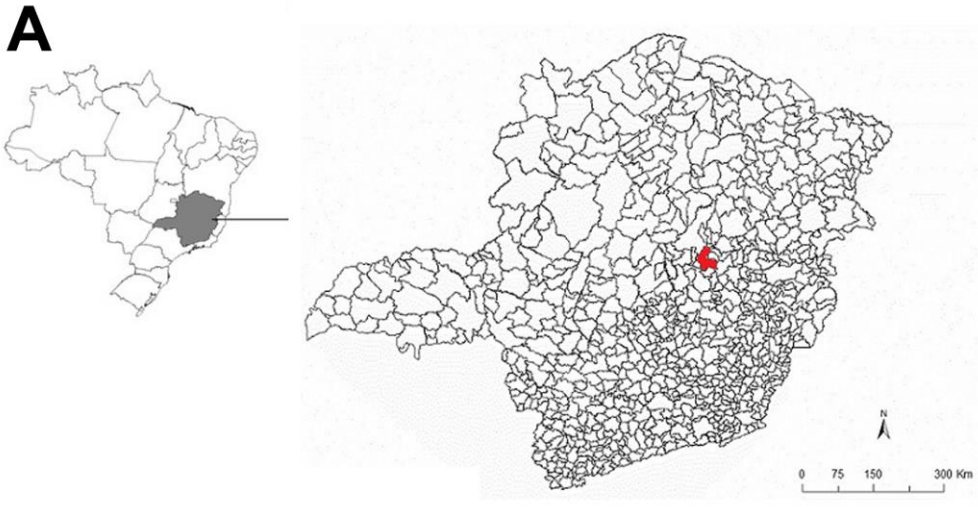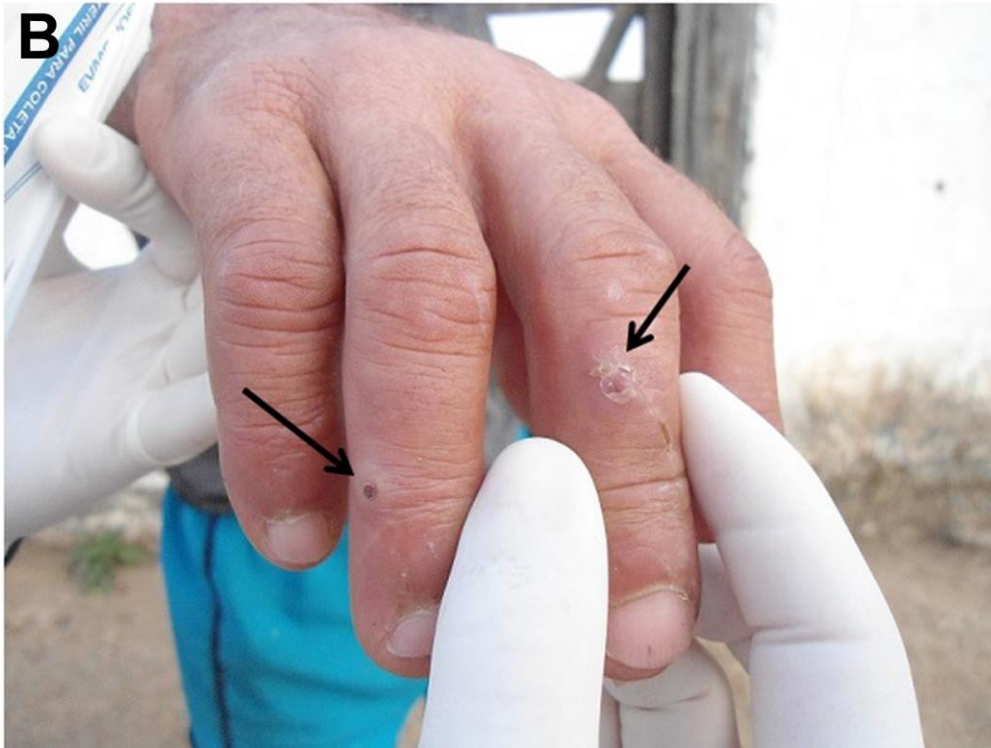

**Technical Appendix Figure.** A) Minas Gerais, Brazil (gray area) and Serro City (red area). B) Lesions (arrows) on the hands of a family member (father). These lesions were similar to those observed during outbreaks of bovine vaccinia, Brazil.
